# Supplementary material for: A dinuclear biomimetic Cu complex derived from l-histidine: synthesis and stereoselective oxidations
Source: Royal Society of Chemistry journal article supplement (doi:10.1039/c7dt00147a), 2017-01-01
Supplement: c7dt00147a1.pdf [file c7dt00147a1.pdf]

## SUPPLEMENTARY INFORMATION

### A dinuclear biomimetic Cu complex derived from L-histidine: Synthesis and stereoselective oxidations

Maria L. Perrone,<sup>a</sup> Elena Salvadeo,<sup>a</sup> Eliana Lo Presti,<sup>a</sup> Luca Pasotti,<sup>a,b</sup> Enrico Monzani,<sup>a</sup> Laura Santagostini,<sup>c</sup> Luigi Casella<sup>\*a</sup>

<sup>a</sup>Dipartimento di Chimica, Università di Pavia, Via Taramelli 12, 27100 Pavia, Italy

<sup>b</sup>Noxamet Srl, Dipartimento di Chimica, Università di Pavia, 27100 Pavia, Italy

<sup>c</sup>Dipartimento di Chimica, Università di Milano, 20133 Milano, Italy

#### Derivation of the kinetic equation for a catalytic reaction requiring the binding of two substrate molecules.

The catalytic oxidations of norepinephrine enantiomers by  $[\text{Cu}_2(\text{EHI})]^{4+}$  show a substrate sigmoidal dependence suggesting the binding of two substrate molecules to the catalyst in order to observe catalysis. The reaction scheme describing the catalytic behavior is as follow:

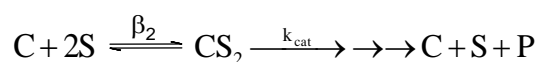

where C is the catalyst, S is norepinephrine,  $\text{CS}_2$  is the catalyst bound to two substrate molecules and P is the product of the reaction.

Assuming that:

- The binding step I fast with respect to the turnover cycle rate (as shown by the fast binding observed in the binding studies with  $[\text{Cu}_2(\text{EHI})]^{4+}$  and considering the slow reaction rates, i.e. moderate  $k_{\text{cat}}$  values)
- The binding of two substrate molecules is needed to perform the reaction (i.e., the  $\text{CS}$  species is catalytically not efficient)

c) Only a minor fraction of the complex with bound only one substrate molecule accumulates during turnover (i.e.,  $[CS] \ll [C] + [CS_2]$ )

According to point a, the binding of the two substrate molecules occurs as a pre-equilibrium, allowing the use of the binding constant  $\beta_2$  (equation 1), together with the mass balance on the catalyst (equation 2), to obtain the species concentration during turnover

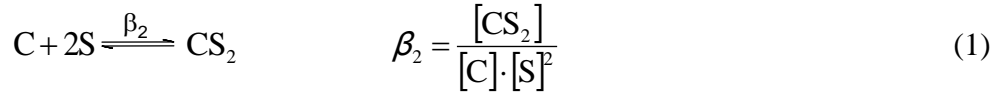

$$[C]_0 = [C] + [CS_2] \quad (2)$$

where  $[C]_0$  is the total (free plus substrate bound) concentrations of the catalyst

$$[CS_2] \text{ can be obtained from equation 1, } [CS_2] = \beta_2 \cdot [C] \cdot [S]^2$$

The substitution of  $[CS_2]$  in equation 2 gives the free (not bound) catalyst concentration:

$$[C] = \frac{[C_0]}{1 + \beta_2 \cdot [S]^2} \quad (3)$$

And then that of the  $CS_2$  species:

$$[CS_2] = \frac{[C_0] \cdot \beta_2 \cdot [S]^2}{1 + \beta_2 \cdot [S]^2} \quad (4)$$

The reaction rate depends on  $[CS_2]$  through equation 5:

$$r = k_{cat} \cdot [CS_2] \quad (5)$$

The rate equation is obtained by combining equations 4 and 5:

$$r = \frac{k_{cat} \cdot [C_0] \cdot \beta_2 \cdot [S]^2}{1 + \beta_2 \cdot [S]^2} \quad (6)$$

and

$$\frac{r}{[C_0]} = \frac{k_{cat} \cdot \beta_2 \cdot [S]^2}{1 + \beta_2 \cdot [S]^2} = \frac{k_{cat} \cdot [S]^2}{1/\beta_2 + [S]^2} = \frac{k_{cat} \cdot [S]^2}{K' + [S]^2} \quad (7)$$

where  $K' = 1/\beta_2$

## Derivation of the kinetic equation to interpret the monomeric-dimeric equilibrium of $[\text{Cu}_2(\text{EHI})]^{4+}$ .

In order to model this peculiar behavior, the kinetic equations were appropriately derived with the assumption that, in substrate-saturating conditions, the oxidation rate depends only on complex concentration. We also assume that the complex exists in two forms in dynamic equilibrium, a monomeric and a dimeric species:

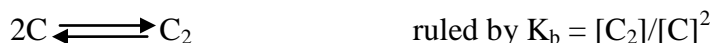

Oxidation rate depends from both  $[\text{C}]$  and  $[\text{C}_2]$

$$r = k_1[\text{C}] + k_2[\text{C}_2]$$

Considering the mass equation:

$$[\text{C}_0] = [\text{C}] + 2K_b[\text{C}]^2$$

appropriate substitution leads to the final equation, used for the interpolation:

$$r = k_1 \left( \frac{-1 + \sqrt{1 + 8 \times K_b \times [\text{C}_0]}}{4K_b} \right) + k_2 K_b \left( \frac{-1 + \sqrt{1 + 8 \times K_b \times [\text{C}_0]}}{4K_b} \right)^2$$

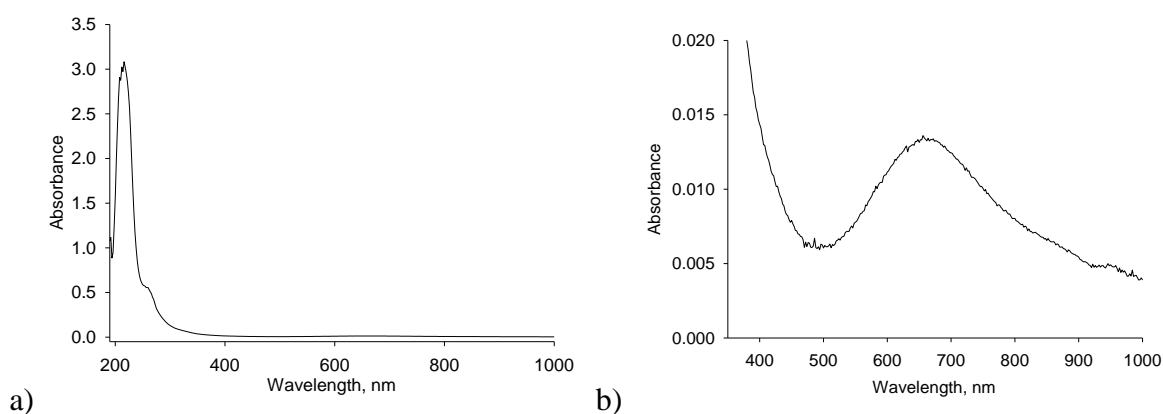

**Figure 1S.** (a) UV-Vis spectra of  $[\text{Cu}_2(\text{EHI})]^{4+}$  in methanol, 0.1 mM. (b) Magnification of the low energy region.

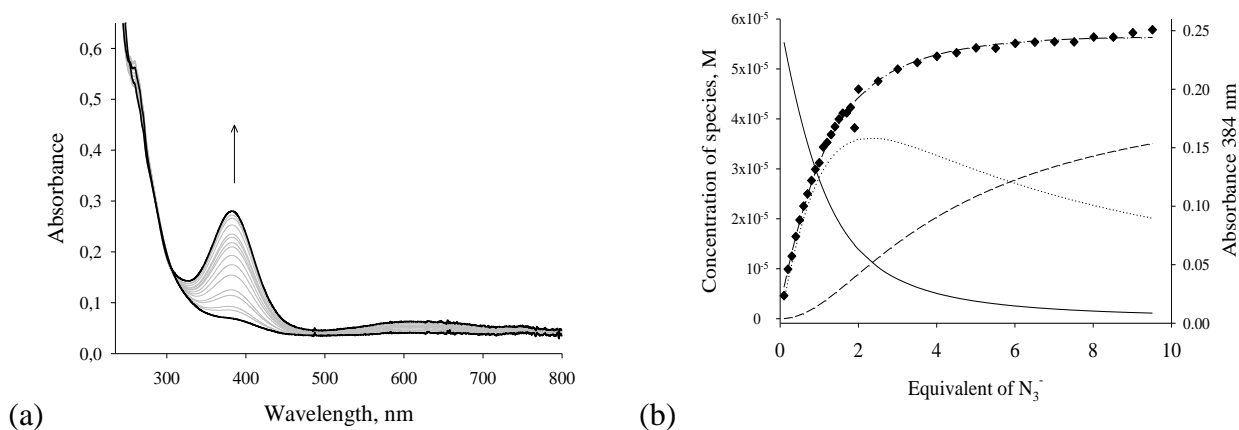

**Figure 2S.** (a) Family of UV-Vis spectra taken upon addition of a concentrated solution of  $\text{NaN}_3$  to  $[\text{Cu}_2\text{EHI}]^{4+}$  in 9:1 methanol/acetonitrile (v/v) solution. Solid black lines: initial and final spectra of the titration, corresponding to  $[\text{Cu}_2\text{EHI}]^{4+}$  and the mixture of  $[\text{Cu}_2\text{EHI}(\text{N}_3)]^{3+}$  and  $[\text{Cu}_2\text{EHI}(\text{N}_3)_2]^{2+}$  species, respectively. (b) Distribution diagram (concentration vs. equiv. of added  $\text{NaN}_3$ ) of the species, calculated for  $\log K_{b1} = 4.61$ , and  $\log K_{b2} = 3.59$ , according to reactions (1) and (2), respectively.

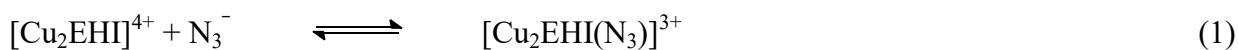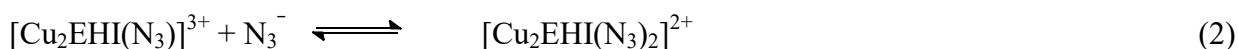

Solid and dotted black lines: free  $[\text{Cu}_2\text{EHI}]^{4+}$  and  $[\text{Cu}_2\text{EHI}(\text{N}_3)]^{3+}$ , respectively; dashed black line:  $[\text{Cu}_2\text{EHI}(\text{N}_3)_2]^{2+}$ . The graph shows the experimental profile of absorbance vs. equiv.  $\text{NaN}_3$  at 385 nm (diamonds) and the fitted curve (dashed line).

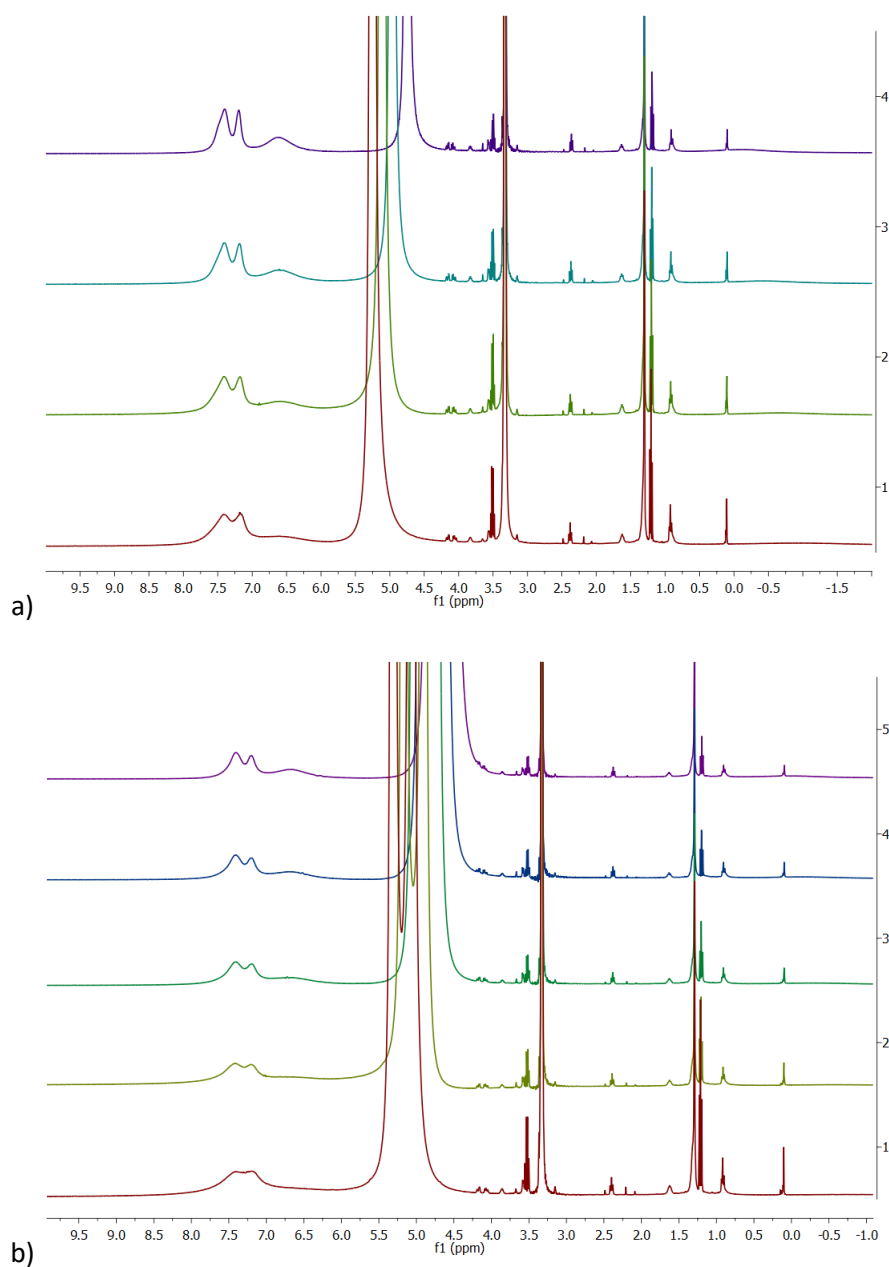

**Figure 3S.** (a)  $^1\text{H}$ -NMR spectral variation of a solution of  $[\text{Cu}_2(\text{EHI})](\text{ClO}_4)_4$  (2.2 mM) in deuterated methanol (MeOD) upon increasing the temperature (trace 1: -15 °C; 2: 0 °C; 3: 15 °C; 4: 35 °C); (b)  $^1\text{H}$ -NMR spectral variation of a solution of  $[\text{Cu}_2(\text{EHI})](\text{ClO}_4)_4$  (1.98 mM) in MeOD/deuterated acetate buffer (50 mM, pH 5.1) 10:1 (v/v) upon increasing the temperature (trace 1: -15 °C; 2: 0 °C; 3: 15 °C; 4: 25 °C; 5: 35 °C).

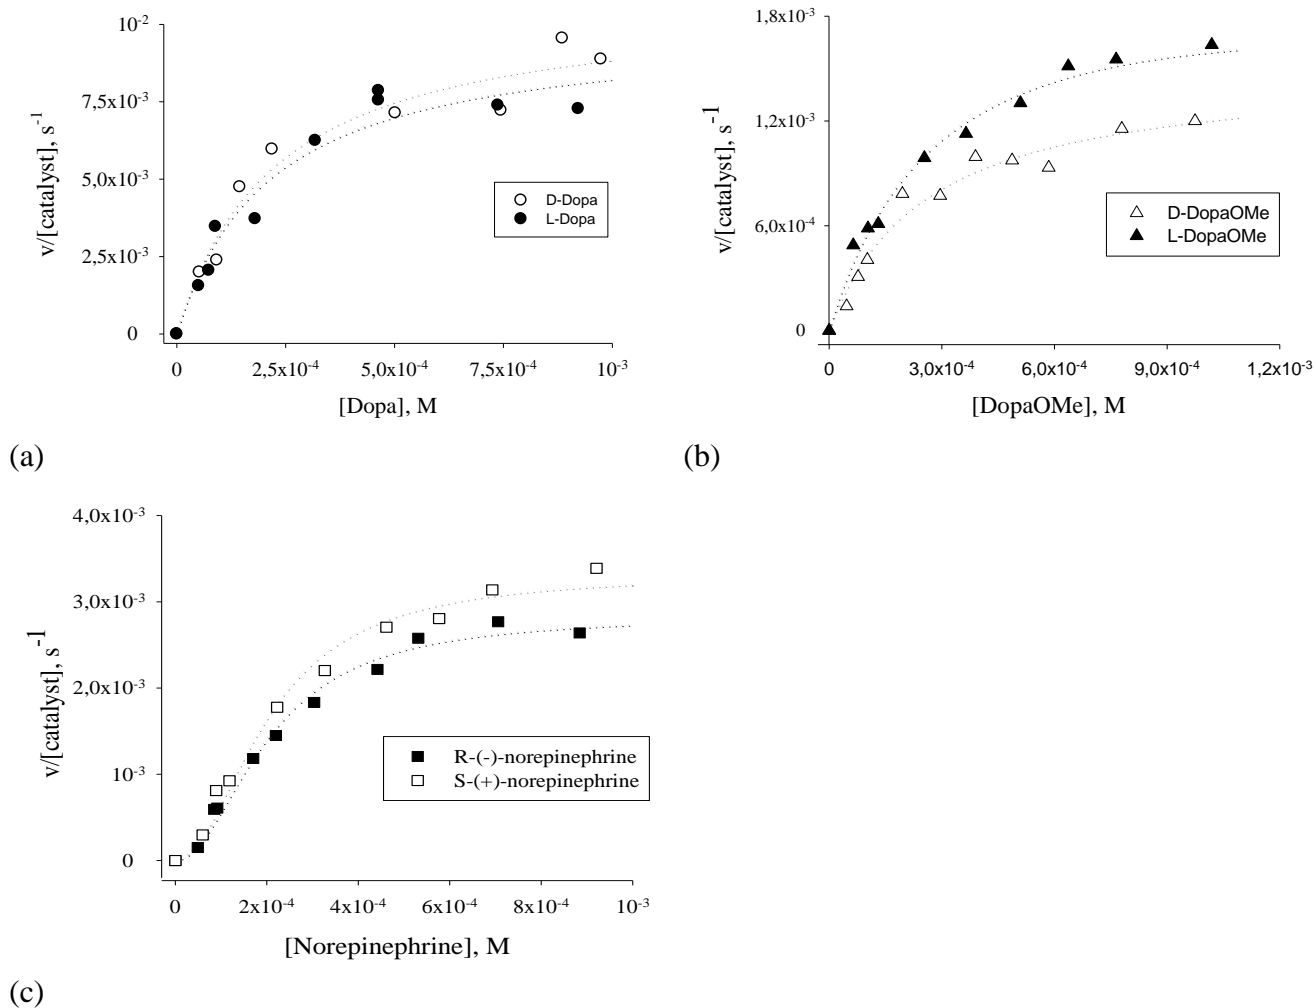

**Figure 4S.** Effect of substrate concentration on the initial rate of oxidation of L-/D-Dopa (a), L-/D-DopaOMe (b), and R-/S-norepinephrine (c) by  $[\text{Cu}_2\text{EHI}](\text{ClO}_4)_4$  ( $1\ \mu\text{M}$ ) in a 10:1 (v/v) mixture of methanol/aqueous acetate buffer (50 mM) at pH=5.1.

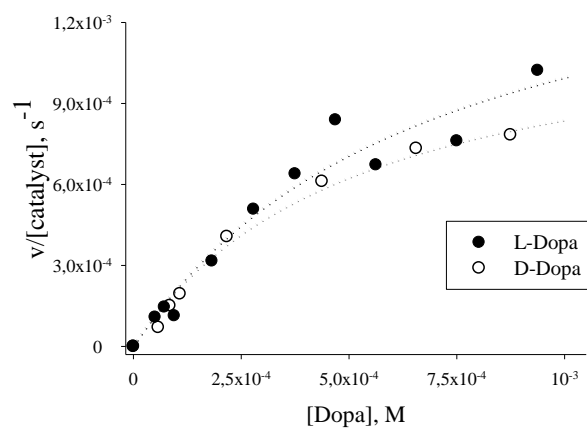

(a)

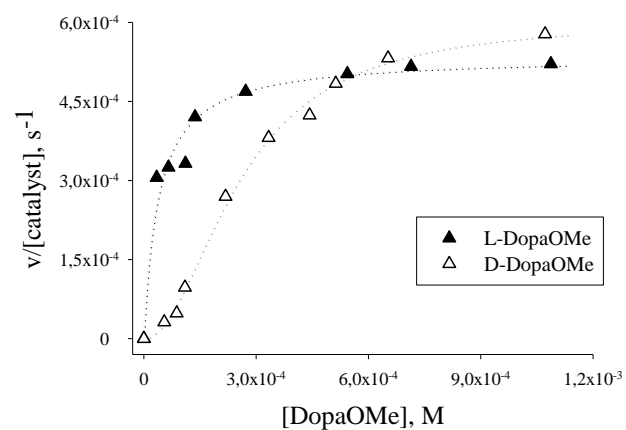

(b)

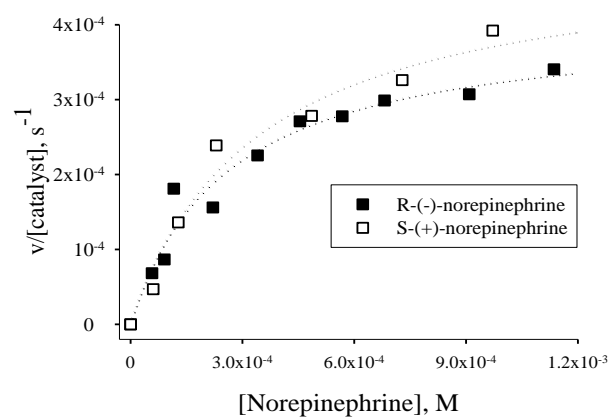

(c)

**Figure 5S.** Effect of substrate concentration on the initial rate of oxidation of L-/D-Dopa (a), L-/D-DopaOMe (b), and R-/S-norepinephrine (c) by  $[\text{Cu}_2\text{EHI}](\text{ClO}_4)_4$  ( $5\ \mu\text{M}$ ) in a 10:1 (v/v) mixture of methanol/aqueous acetate buffer (50 mM) at pH=5.1.

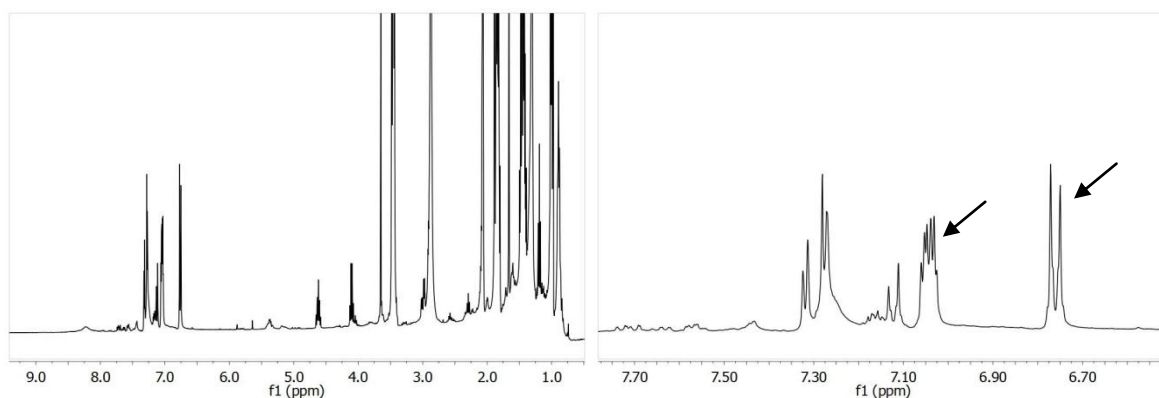

**Figure 6S.** (Left)  $^1\text{H}$  NMR spectrum in acetone  $\text{d}_6$  ( $\delta$  values, ppm) of the crude product mixture of hydroxylation reaction of the TBA salt of L-tyrosine. (Right) Expansion of the aromatic region of the spectrum, unreacted phenol signals are indicated with arrows.

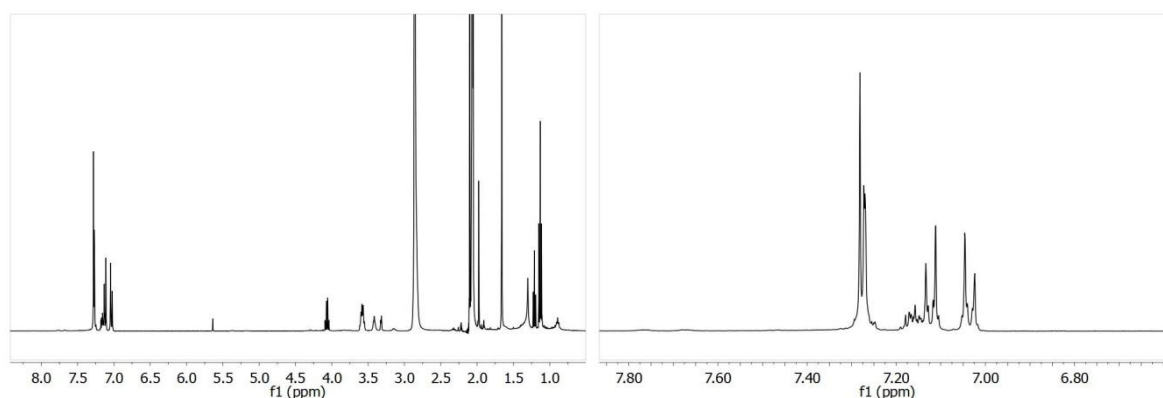

**Figure 7S.** (Left)  $^1\text{H}$  NMR spectrum in acetone  $\text{d}_6$  ( $\delta$  values, ppm) of the main product from the hydroxylation reaction of the TBA salt of L-tyrosine. (Right) Expansion of the aromatic region of the spectrum.



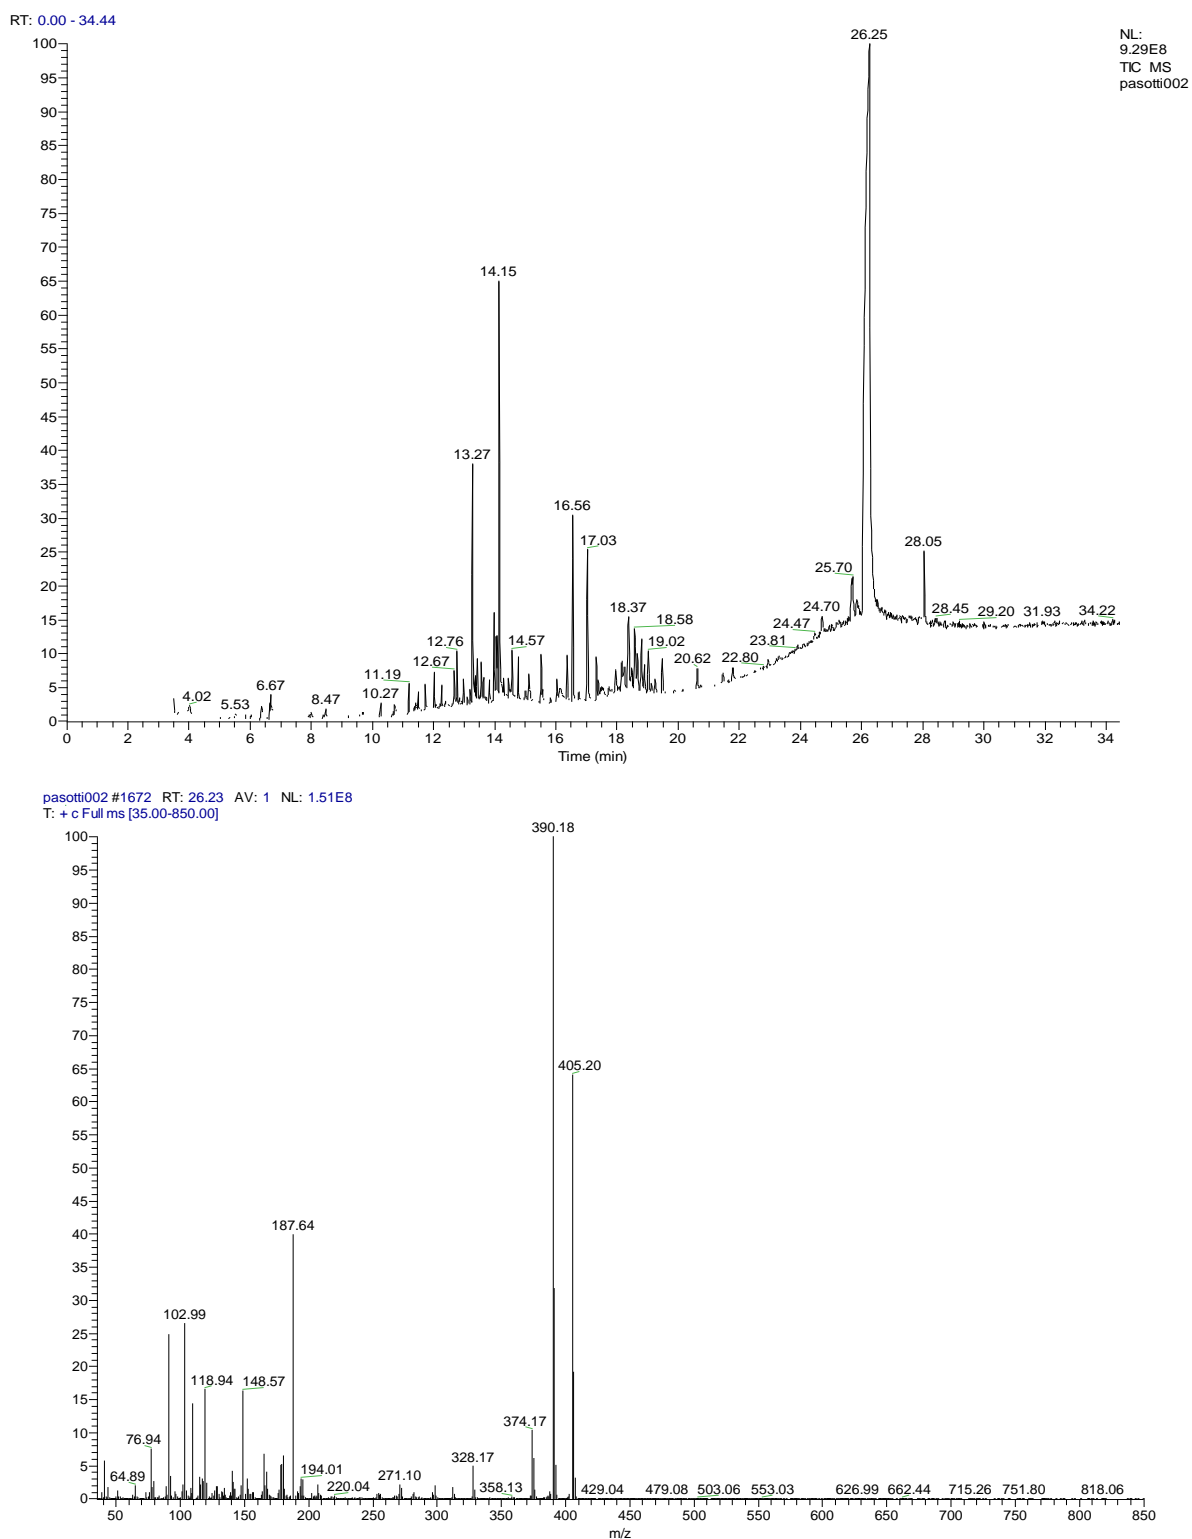

**Figure 8S.** GC-MS chromatogram of product mixture of the hydroxylation reaction of the TBA salt of L-tyrosine (upper trace) and fragmentation pattern of the main product (bottom trace), with retention time of 26.25 min.

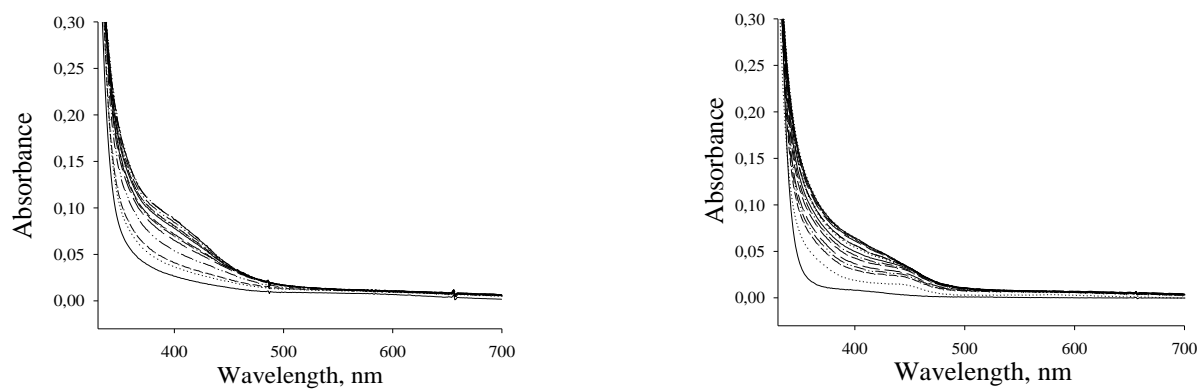

**Figure 9S.** UV-Vis spectral changes observed during the oxidation of tetrabutylammonium salts of *N*-acetyl-L-tyrosine ethyl ester (left), and *N*-acetyl-D-tyrosine ethyl ester (right) by  $[\text{Cu}_2(\text{EHI})]^{2+}/\text{O}_2$ .
